# Supplementary figures and images for: Axonal mitochondria adjust in size depending on g‐ratio of surrounding myelin during homeostasis and advanced remyelination
Source: PubMed Central journal article supplement — J Neurosci Res. 2020 Dec 25;99(3):793–805. doi: 10.1002/jnr.24767 (PMC7898477; doi:10.1002/jnr.24767), 2020-12-25

**A**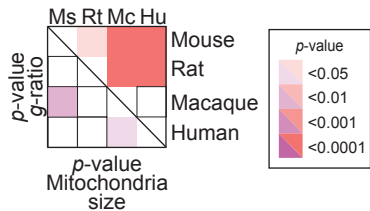**B**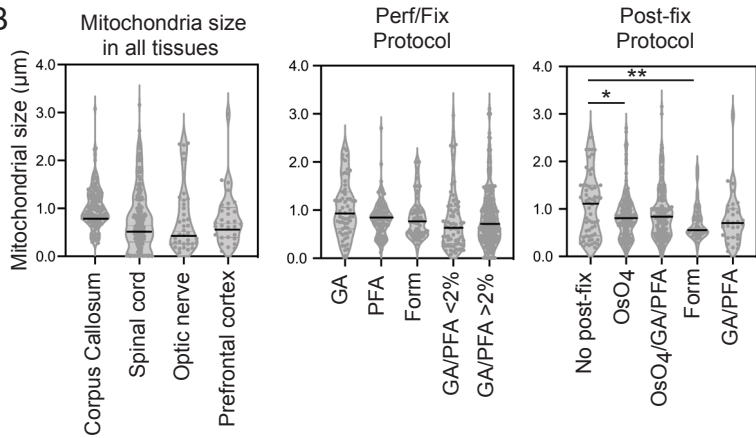**C**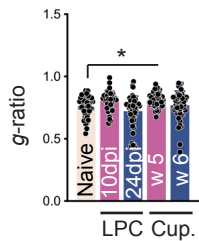**D**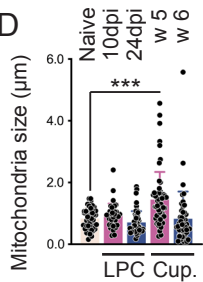

Supplement: JNR-99-793-s001.pdf [file JNR-99-793-s001.pdf]
